# Expectations boost the reconstruction of auditory features from electrophysiological responses to noisy speech

**Abbreviated Title:** Expectations boost reconstruction of noisy speech

Andrew W. Corcoran<sup>1,2</sup>, Ricardo Perera<sup>1</sup>, Matthieu Koroma<sup>3</sup>, Sid Kouider<sup>3</sup>, Jakob Hohwy<sup>1,2</sup>, & Thomas Andrillon<sup>2,4</sup>

<sup>1</sup>Cognition & Philosophy Laboratory, School of Philosophical, Historical, and International Studies, Monash University, Melbourne, Australia

<sup>2</sup>Monash Centre for Consciousness & Contemplative Studies, Faculty of Arts, Monash University, Melbourne, Australia

<sup>3</sup>Brain and Consciousness Group (ENS, EHESS, CNRS), Département d'Études Cognitives, École Normale Supérieure-PSL Research University, Paris, 75005, France

<sup>4</sup>Paris Brain Institute, Sorbonne Université, Inserm-CNRS, Paris, 75013, France.

**Corresponding author:** Andrew W. Corcoran, Room E672, 20 Chancellors Walk, Clayton, VIC 3800, Australia. E-mail: [andrew.corcoran1@monash.edu](mailto:andrew.corcoran1@monash.edu)

**Number of pages:** 40

**Number of figures:** 4

**Number of tables:** 0

## Word count

**Abstract:** 247

**Introduction:** 671

**Discussion:** 1582

**Conflict of interest statement:** The authors declare no competing financial interests.

**Acknowledgments:** We thank Madeline Daveney and Jing Xuan Wang for their help in data collection. AWC and RP were supported by Australian Government Research Training Program (RTP) Scholarships. AWC was supported by a Monash University Faculty of Arts Postgraduate Publication Award. MK was supported by the Direction Générale de l'Armement (DGA). JH is supported by the Australian Research Council DP190101805/DP160102770 and by the Three Springs Foundation. TA was supported by a Platform Access Grant from Monash University and a Long-Term Fellowship from the Human Frontier Science Program (LT000362/2018-L).

## Abstract

Online speech processing imposes significant computational demands on the listening brain. Predictive coding provides an elegant account of the way this challenge is met through the exploitation of prior knowledge. While such accounts have accrued considerable evidence at the sublexical- and word-levels, relatively little is known about the predictive mechanisms that support sentence-level processing. Here, we exploit the ‘pop-out’ phenomenon (i.e. dramatic improvement in the intelligibility of degraded speech following prior information) to investigate the psychophysiological correlates of sentence comprehension. We recorded electroencephalography and pupillometry from 21 humans (10 females) while they rated the clarity of full sentences that had been degraded via noise-vocoding or sine-wave synthesis. Sentence pop-out was reliably elicited following visual presentation of the corresponding written sentence, despite never hearing the undistorted speech. No such effect was observed following incongruent or no written information. Pop-out was associated with improved reconstruction of the acoustic stimulus envelope from low-frequency EEG activity, implying that pop-out is mediated via top-down signals that enhance the precision of cortical speech representations. Spectral analysis revealed that pop-out was accompanied by a reduction in theta-band power, consistent with predictive coding accounts of acoustic filling-in and incremental sentence processing. Moreover, delta- and alpha-band power, as well as pupil diameter, were increased following the provision of any written information. We interpret these findings as evidence of a transition to a state of active listening, whereby participants selectively engage attentional and working memory processes to evaluate the congruence between expected and actual sensory input.

**Keywords:** pop-out, speech comprehension, predictive processing, EEG, stimulus reconstruction, pupillometry

## Significance Statement

Continuous speech processing depends on the integration of top-down expectations and bottom-up sensory inputs, the neurophysiological substrates of which remain poorly understood. Here, we investigate the neural correlates of auditory filling-in using full sentences and two complementary forms of speech degradation (noise-vocoded and sine-wave speech). The effect of prior expectation was assessed through the reconstruction of noisy stimuli from the electroencephalogram (EEG) using a multivariate model trained on a separate dataset in which participants listened to clear speech. Prior expectations were delivered in a different modality (visual) to focus our investigation on top-down processes. Our findings demonstrate how prior expectations from one modality can be flexibly transferred to another to recover the meaning of continuous speech from degraded stimuli.

## Introduction

The ability to understand spoken language is a remarkable feat of human cognition. Fluent speech recognition requires the parsing of a continuously changing acoustic signal into a series of discrete units, and the mapping of these units onto abstract representations across multiple scales (Halle and Stevens, 1962; Hickok and Poeppel, 2007). Such processing must occur quickly enough to keep abreast of unfolding speech (Christiansen and Chater, 2016), while remaining robust to signal variation and degradation (Mattys et al., 2012; Guediche et al., 2014). There is growing consensus that the brain meets these demands by predicting sensory input on the basis of prior knowledge (Kuperberg and Jaeger, 2016; Bornkessel-Schlesewsky and Schlesewsky, 2019; Brodbeck and Simon, 2020). However, the neurocomputational mechanisms supporting such processes remain poorly understood.

Prediction has long been accorded an important role in language comprehension (e.g., Miller and Isard, 1963; Tulving and Gold, 1963). Contemporary predictive coding models of speech processing formalise this notion in terms of (hierarchical) Bayesian inference, whereby perceptual experience reflects the integration of ‘top-down’ prior expectations (derived, e.g., from lexical, speaker, or world-knowledge) and ‘bottom-up’ sensory evidence (see Friston and Kiebel, 2009; Heilbron and Chait, 2018). On this view, resolved speech content constitutes the brain’s ‘best guess’ about the causes of sensory input, given an internal model of the way sensations are generated (cf. ‘analysis-by-synthesis’; Halle and Stevens, 1959; Poeppel et al., 2008).

Prior knowledge plays a decisive role in word recognition. In degraded speech, intelligibility can be improved by the provision of lexical information (e.g., the undistorted/written version of the word; Giraud et al., 2004; Dehaene-Lambertz et al., 2005). Such information typically engenders a dramatic improvement in the subjective clarity of the degraded utterance -- a striking change in perceptual experience referred to as ‘pop-out’ (Davis et al., 2005).

Consistent with predictive coding, auditory cortical responses to degraded words tend to be suppressed during the experience of pop-out (Sohoglu et al., 2012; Sohoglu and Davis, 2016; cf. Banellis et al., 2020). Similar findings have been observed during the ‘filling-in’ of speech sounds at the sublexical level (Riecke et al., 2012; Shahin et al., 2012; Leonard et al., 2016). Interestingly, auditory cortical responses to degraded words vary according to stimulus quality and prior expectation: while less-degraded speech evokes more suppression when expectations are realised, neural activity is *enhanced* when expectations are violated (Blank and Davis, 2016; Sohoglu and Davis, 2020). This coheres with the view that the discrepancy between expectations and sensory inputs (*prediction errors*) depends on the quality (*precision*) of sensory input.

Few studies have investigated the predictive mechanisms underpinning degraded speech processing at the sentence-level. Consistent with the studies mentioned above, sentence pop-out is associated with increased low-level sensory processing relative to clear speech (Tuennerhoff and Noppeney, 2016). Electrophysiological recordings have revealed that auditory cortical ensembles rapidly tune to spectro-temporal speech features during sentence pop-out (Holdgraf et al., 2016), while acoustic-phonemic encoding activity is suppressed (Di Liberto et al., 2018), yet better-aligned (‘entrained’) to the stimulus (Baltzell et al., 2017). However, as these studies induced pop-out by presenting clear speech prior to degraded speech, it remains uncertain whether these findings were driven by top-down expectations, or from previous exposure to the intact utterance.

This study investigates the psychophysiological correlates of speech comprehension in sentences degraded via noise-vocoding or sine-wave synthesis. We used these two complementary methods of speech degradation in order to remove specific auditory features: spectral cues in noise-vocoding (Shannon et al., 1995), and fine-grained temporal features in sine-wave synthesis (Remez et al., 1981). Pop-out was induced using visual

(written) information, thereby ensuring that expectations were conveyed in a cross-modal, top-down fashion (Wild et al., 2012; Sohoglu et al., 2014). Cortical responses during pop-out were contrasted with those elicited in trials that were not preceded by correct information. We expected cortical speech tracking (i.e. quality of envelope reconstruction) to improve during pop-out, indicating that prior knowledge of speech content facilitates the cortical encoding of degraded sentences. The underlying mechanisms of sentence pop-out were interrogated via spectral analysis and pupillometry.

## Materials and Methods

### Participants

Twenty-one native English-speaking adults were recruited to participate in this study. Of these, two were excluded due to faulty EEG recordings. The remaining sample comprised 8 females and 11 males aged 19 to 33 years ( $M = 25.8$ ,  $SD = 4.5$ ). All participants reported normal (or corrected-to-normal) vision and audition.

All participants provided written, informed consent, and were remunerated AU\$30 for their time. This protocol was approved by the Monash University Human Research Ethics Committee (Project ID: 10994).

### Stimuli

A total of 80 pairs of English sentences were constructed. These pairs had similar grammatical structures and lengths (11.6 words on average). They were divided into 5 lists of 16 pairs (32 sentences per list). Each sentence was vocoded using Apple OS's noise-to-speech command 'say' (voice: 'Alex'; gender: male; sampling rate: 44.1 kHz; rate: 200 words/minute). Each vocoded sentence was approximately 3.5 s long and was then concatenated three times to obtain audio files of ~10.5 s. The sounds were saved in the Audio Interchange File Format (AIFF) format and converted to the MPEG-1 Audio Layer III (MP3) format using the "Swiss Army Knife of Sound" (SoX) command line utility.

We then used publicly available scripts written for PRAAT (Boersma and Weenink, 2011) to turn clear speech into sine-wave speech (SWS) and noise-vocoded speech (NVS). These files were saved in the Waveform Audio File Format (WAV) format. Clear audio files were also converted to the WAV format. In SWS, phonemes' formants are replaced by sinusoids at the same frequency, stripping fine-grained temporal acoustic features from the original

clear speech and thereby making SWS speech-like but unintelligible (Remez et al., 1981). In NVS, the amplitude of clear speech in a set of fixed logarithmically-spaced frequency bands (here, 6 bands) is used to modulate white-noise. This transformation preserves the temporal cues of the original signal but erases the spectral cues (Shannon et al., 1995).

Consequently, SWS and NVS represent two complementary ways of degrading clear speech by removing fine-grained temporal cues (SWS) or spectral information (NVS; see Figure 1A).

The amplitude of the degraded speech was equalised across all sentences and the duration was adapted to a fixed 10.5 s interval using the VSOLA algorithm. In addition to these sentences, in the training session, we also played to participants an audiobook (Cat-Skin from Grimms' Fairy Tales, LibriVox) for a duration of 11' 38". The properties of the speech (female voice, rate, etc.) were not modified except for the overall volume (same volume as degraded sentences). All auditory stimuli were delivered using the Psychtoolbox extension (v3.0.14; Brainard, 1997) for Matlab (R2018b; The MathWorks, Natick, MA, USA) running on Linux. The stimuli were played using speakers placed in front of the participant.

## **Experimental Design and Procedure**

Participants performed the experimental task while sitting at a desk with their head stabilised on a chinrest ~50 cm from the monitor. Following a 9-point eye-tracker calibration, participants were instructed to actively attend to an audiobook (training) while maintaining fixation on a cross at the centre of the computer screen. They subsequently performed 6 blocks of 16 experimental trials each (test trials) for a total of 96 trials (16 trials per condition). Participants were instructed to maintain central fixation and refrain from excessive blinking while listening to the sentence presentations, but were permitted to blink and saccade outside these periods. Blocks were separated by self-paced breaks, with a recalibration of the eye-tracker prior to block 4. In total, the experimental procedure lasted approximately 75 min.



Each test trial started with the presentation of one noisy stimulus (NVS or SWS; 10.5 s long). Participants were then asked to rate the clarity (intelligibility) of the noisy stimulus on a 4-point scale (1 = “I did not understand anything”; 2 = “I understood some of the sentence”; 3 = “I understood most of the sentence”; 4 = “I clearly understood everything”). Following this first clarity rating, participants were visually displayed either the corresponding written sentence (P+), or another sentence (P-), or no sentence (P0) for a fixed duration of 4 s. In all cases, the same noisy stimulus was presented a second time and participants were asked to rate the clarity of the stimulus using the same 4-point scale. Following this, when a sentence was visually displayed between the two presentations (P+ and P- conditions), participants were asked to indicate whether the displayed sentence corresponded to the noisy stimulus (Yes or No). A pause of 1.5 to 2 s (random jitter) was introduced before starting the next trial. See Figure 1B for a schematic illustration of the trial procedure.

Participants heard a total of 96 stimuli. Four lists of 16 stimulus pairs were attributed to experimental conditions (stimulus type: SWS or NVS; prior condition: P+, P-), while the remaining list of 16 stimulus pairs was attributed to the condition P0. The attribution was randomly assigned and counterbalanced across participants following a latin-square design. For conditions P+ and P-, the participants were exposed to one sentence per pair from the corresponding lists (see section above on Stimuli). This allowed us to present to participants, in the case of the P- condition, a sentence close to (but different from) the one heard in the trial, and never heard or seen earlier or later on in the experiment. For the P0 condition, pairs of the remaining list were split across two conditions as no written sentence was shown to the participant, resulting in 16 stimuli per condition (stimulus type: SWS or NVS, prior condition: P0). Overall, every stimulus was novel when presented the first time and heard exactly twice within one trial throughout the whole experiment and across all conditions.

## EEG acquisition and preprocessing

The electroencephalogram (EEG) was continuously recorded during both the training (audiobook) and test trials (noisy speech) from 64 Ag/AgCl EasyCap mounted active electrodes. The recording was acquired at a sampling rate of 500 Hz using a BrainAmp system in conjunction with BrainVision Recorder (v1.21.0402; Brain Products GmbH, Gilching, Germany). AFz served as the ground electrode and FCz as the online reference.

Offline preprocessing was performed in MATLAB R2019b (v9.7.0.1319299; The MathWorks, Natick, MA, USA) using custom-build scripts incorporating functions from the FieldTrip (v20200623; Oostenveld et al., 2011) and EEGLAB (v2019.1; Delorme and Makeig, 2004) toolboxes. For the training data, the EEG was segmented in a single epoch from 5 s before the start of the audiobook to 5 s after its end. For test trials, EEG data were segmented into 20 s epochs beginning 5 s before stimulus onset. All epochs were centred around 0 prior to high- and low-pass filtering (1 Hz and 125 Hz, respectively; two-pass 4th-order Butterworth filters). A notch (discrete Fourier transform) filter was also applied at 50 and 100 Hz to mitigate line noise.

For test trials, epoch and channel data were manually screened for excessive artefact using the 'ft\_rejectvisual' function. A median 3 channels (range = [1, 5]) and 2 epochs (range = [0, 5]) were rejected per participant (note, an additional 5 trials were missing for one participant due to technical error). For training data, we performed only the channel rejection. Rejected channels were interpolated via the weighted neighbour approach as implemented in the 'ft\_channelrepair' function (where channel neighbours were defined by triangulation).

Channels were re-referenced to the common average prior to independent component analysis ('runica' implementation in FieldTrip of the logistic infomax ICA algorithm; Bell and Sejnowski, 1995). ICA was performed on the test and training data separately. Components

were visually inspected and those identified as ocular (median number of rejected components = 2; range = [0, 3]), cardiac (median = 0, range = [0, 2]), or non-physiological (median = 0, range = [0, 2]) in origin were subtracted prior to backprojection.

## **Pupillometry acquisition and preprocessing**

Eye-movements and pupil size on both eyes were recorded with a Tobii Pro TX300 system (Tobii Pro) with a sampling rate of 300 Hz. We recorded good-quality data in only 17 participants. One participant had incomplete data (43/96 trials). The eye-tracker was calibrated at the start of each recording. Blinks were detected as interruption of the eye-tracking signal on each eye independently (maximum duration = 5 s). For each of these blinks, the pupil size was corrected by linearly interpolating the median signal preceding the blink onset ([-0.1, 0]s) and following the blink offset ([0, 0.1]s). The corrected signal was then low-pass filtered below 6 Hz (two-pass 4th order Butterworth filter) and the pupil size for each eye averaged together. Continuous averaged pupil data was then epoched according to the presentation onset ([-1, 11]s) and both the first and second presentation windows were baseline corrected using the average pupil size before the first presentation ([-1, 0]s). Event-related potentials were computed on these epochs (see Figure 4B).

## **Data analysis**

### *Stimulus reconstruction.*

We used a stimulus reconstruction approach to estimate the quality of auditory processing from the EEG. In particular, we focused on the reconstruction of the auditory envelope of the noisy speech from EEG recordings. Our rationale was that participants' ability to extract relevant cues from the noisy speech should be reflected in a better entrainment of EEG activity by the noisy speech and, therefore, as a better ability to reconstruct this envelope from EEG recordings. A similar approach was successfully applied to decode attention when

participants are exposed to clear speech in a multitalker environment (O'Sullivan et al., 2015; Legendre et al., 2019) or to reconstruct the envelope of NVS (Di Liberto et al., 2018).

We first extracted the acoustic envelope of the training and test stimuli in the 2-8 Hz band. This band was chosen for its correspondence with speech's syllabic rhythms and the robust entrainment of EEG oscillations with speech envelope observed in this frequency band (Giraud and Poeppel, 2012; Peelle and Davis, 2012; O'Sullivan et al., 2015). To do so, we ran the 10.5 s degraded speech as well as the training stimulus through a peripheral auditory model using the standard Spectro-Temporal Excitation Pattern approach (STEP; Leaver and Rauschecker, 2010). The stimuli were first resampled at 22.05 kHz and passed through a bandpass filter simulating outer and middle-ear pre-processing. Cochlear frequency analysis was then simulated by a bank of linear gammatone filters (N=128 filters). Temporal integration was applied on each filter output by applying half-wave rectification and a 100 Hz low-pass 2nd-order Butterworth filter. Next, square-root compression was applied to the smoothed signals and the power in each frequency band was log-transformed. Finally, the auditory envelope was computed by summing the envelope of the 128 gammatone filters and downsampled to 100 Hz.

For each presentation of the (training or test) stimuli, we processed the EEG recordings as follows. ICA-corrected, epoched data were re-referenced to the average of all EEG electrodes, bandpass-filtered between 2 and 8 Hz using a two-pass Finite Impulse Response (FIR) filter, and then resampled at 100 Hz. We trimmed the EEG epochs so that the start and end corresponded to the start and end of the stimulus presentation.

We then used the Multivariate Temporal Response Function (mTRF) Toolbox (v2.0; Crosse et al., 2016) for Matlab to build a linear model between auditory and EEG signals from the training session (clear speech). By using an independent part of the experiment compared to test trials, and by using clear speech, we ensured that the model was not affected by our

experimental design and represented normal speech processing. EEG data were shifted relative to the auditory envelope from 0 ms to 300 ms in steps of 10 ms (31 time lags), allowing the integration of a broad range of EEG data to reconstruct each stimulus time point. The linear model was optimized to map the EEG signal from each electrode and time lag to the sound envelope. The obtained filter (matrix of weights: sensor x time lags) was then used in the test trials to reconstruct the stimuli.

In the test trials, we used the model trained on clear speech (training set) to reconstruct the envelope of the noisy stimuli. This was done independently for each of the two presentations of the stimuli in each trial. Finally, the reconstructed envelope was compared to the envelope of the degraded stimulus played for this trial (NVS or SWS) by computing the Pearson's correlation coefficient between the real and reconstructed envelope of the degraded speech. We computed this coefficient for the three repetitions of the same sentence in each stimulus presentation. This coefficient (bounded between -1 and 1) was used as an index of the quality of the stimulus reconstruction. In our analyses, we focused on the first presentation of the sentence within a given trial and the first following the presentation of the correct (P+), incorrect (P-), or no (P0) visual sentence information (first 3.5 s of each presentation). This decision mitigated potential fluctuations in task engagement over the course of the 2nd presentation depending on whether stimuli elicited pop-out.

#### *Time-frequency decomposition.*

EEG data from test trials were subjected to spectral (time-frequency) analysis. Preprocessed datasets were re-referenced to the average of linked mastoids. Spectral power estimates were then computed for epochs spanning -2 to 12 s relative to stimulus onset over a frequency range of 1 to 30 Hz (1 Hz increments) using the 'ft\_freqanalysis' function (Hanning taper length = 1 s; 100 ms increments). As in the stimulus reconstruction analysis, time-frequency analysis was limited to the first iteration of each sentence presentation period

(timepoints spanning [0.5, 3] s; first and last 0.5 s omitted to avoid spurious/confounding effects pertaining to stimulus onset/offset and spectral leakage).

Channel-level spectral power estimates were averaged across time for each trial, and averaged across trials for each factorial combination of sentence type, prior condition, and presentation order. Averaged power estimates were then  $\log_{10}$  transformed and subjected to a nonparametric cluster-based permutation analysis (Maris and Oostenveld, 2007) as implemented in FieldTrip. Briefly, this procedure involves computing dependent-samples  $t$ -tests across pairwise power estimates for each corresponding channel x frequency bin, identifying  $t$ -values that exceed a specified alpha threshold (0.025, two-tailed test), and clustering these samples into spatio-spectrally contiguous sets (minimum 2 neighbouring channels located within a 40 mm radius; average 3.9 neighbours per channel).  $T$ -values within each resolved cluster were then summed and the maximum value assessed against a Monte Carlo simulation-based reference (null) distribution generated over 1000 random permutations. We derived a Monte-Carlo  $p$ -value from this comparison, which we used to determine the significance of the identified clusters.

To test the interaction of interest, the difference between 1st and 2nd presentation power estimates was contrasted across pairwise combinations of prior conditions for each sentence type. Clusters with a Monte Carlo  $p$ -value  $<.05$  were deemed indicative of a significant difference between contrasts. Importantly, this procedure only licences inferences about the existence of a statistically significant difference between contrasts; it does not permit the topographic or spectral localisation of such effects (see Maris and Oostenveld, 2007; Maris, 2012; Sassenhagen and Draschkow, 2019). This caveat notwithstanding, the frequency bounds of the resolved clusters were used to inform the selection of frequency band limits in the subsequent linear mixed-effects analysis (see *Statistical modelling* section below).

*Time-resolved oscillatory activity.*

To examine the temporal evolution of electrophysiological dynamics during sentence processing, we complemented our analysis of time-averaged changes in spectral power with time-resolved profiles of induced (i.e. non-phase-locked) oscillatory activity. These profiles were derived using an intertrial variance method of estimating event-related (de)synchronisation (Kalcher and Pfurtscheller, 1995; Pfurtscheller and Lopes da Silva, 1999). ICA-corrected, mastoid-referenced EEG data were high- and low-pass filtered (one-pass zero-phase FIR filters) into the same frequency bands derived following the time-frequency cluster-based permutation analysis. For each frequency band, filtered signals were divided into factorial combinations of stimulus type, prior condition, and presentation order, and the evoked response subtracted from each set. Waveforms were then squared,  $\log_{10}$  transformed, and averaged within each set. The resulting spectral profiles were smoothed using a moving average filter ('movmean', 500 ms sliding window) and downsampled to 10 Hz.

Spectral profiles of induced activity were compared across conditions using a similar cluster-based permutation approach to that described above (*Time-frequency decomposition*), with the exception that channel-wise power estimates were clustered over the temporal (rather than frequency) dimension. Permutation tests evaluating the temporal evolution of induced power dynamics were performed on the entire 2nd presentation window ([-1, 11]s). This analysis was conducted separately for SWS and NVS sentences, in order to explore qualitative differences in the temporal patterning of neural responses under these two stimulus types. The temporal dynamics of pupil size were examined using the same statistical procedure in the temporal domain, but without the spatial (electrode) dimension.

## Statistical modelling

Statistical analysis of trial-level subjective clarity ratings, frequency band power, and stimulus reconstruction scores was performed in *R* (v3.6.2; R Core Team, 2019). Our general strategy

for each analysis was to fit the appropriate mixed-effects model to the dependent variable of interest from the 2nd presentation, and regress these estimates onto the corresponding estimate from the 1st presentation (including the 1st presentation estimate as a covariate essentially functions as a form of baseline correction; see Alday, 2019). Additional independent variables were stimulus type (SWS, NVS), prior condition (P+, P-, P0), and the interaction between these factors, which were introduced into the model in that order. Model comparisons (see below) were performed using the ‘anova’ function to assess whether the additional complexity introduced by each new fixed (and accompanying random) effect term was merited by a sufficient improvement in model fit. Categorical variables (stimulus type, prior condition) were sum-to-zero contrast-coded (reference level coded -1).

All mixed-effects models were fitted with by-participant random intercepts. We fitted maximal random effects structures for all fixed effects of interest (i.e. stimulus type, prior condition) on this intercept (Barr et al., 2013). Random intercepts were also specified for sentence items in all models; EEG electrode channel locations were included as random intercepts in the spectral power models only (see Liebherr et al., 2021, for a similar approach).

Subjective clarity ratings following the 2nd presentation were modelled as ordinal data using a (logit-linked) cumulative link mixed-effects model (i.e. proportional odds mixed model). This model was fit via the Laplace approximation using the ‘clmm’ function from the *ordinal* package (Christensen, 2019) in *R*. No assumptions about the distance between cut-point thresholds were specified.

Linear mixed-effects models for spectral power (averaged over time and frequency bins; first sentence iteration only) and stimulus reconstruction scores (first sentence iteration only) were fitted using the ‘lmer’ function from the *lme4* package (v1.1-23; Bates et al., 2015). In addition to the fixed effects described above (which were again introduced in a sequential fashion to enable model comparison), an ordered factor encoding the clarity rating on the 1st



presentation was included as a covariate. Model diagnostics were assessed with the aid of the *performance* package (v0.5.0; Lüdtke et al., 2021).

The significance of main effect and interaction terms for each winning model was assessed using likelihood-ratio chi-square tests from Type-II analysis-of-deviance tables obtained via the *RVAideMemoire* package (v0.9-79; Hervé, 2021) for the cumulative link mixed-effects models; equivalent tables were obtained from the *car* package (v3.0-10; Fox and Weisberg, 2019) for the linear mixed-effects models. Significant effects were disambiguated using post-hoc contrasts (Tukey corrected for multiple comparisons) obtained from the *emmeans* package (v1.5.1; Lenth, 2020), which was also used to estimate marginal mean predictions for model visualisation. Model predictions and individual-level estimates were visualised with the aid of the *tidyverse* package (v1.3.0; Wickham et al., 2019).

## **Data and code accessibility**

This study was not pre-registered. De-identified raw data used to perform these analyses are openly shared on the Open Science Framework platform.

Data: <https://osf.io/5qxdx>

All code used to perform these analyses are made available to reviewers and will be openly shared upon acceptance and publication of the manuscript.

Code: [https://github.com/corcorana/SWS\\_NVS\\_code](https://github.com/corcorana/SWS_NVS_code)

## Results

### Correct prior information evokes perceptual pop-out

We first examined participant- and group-level average clarity ratings to determine if our protocol was successful in eliciting perceptual pop-out (Figure 1C). We found that prior condition had a significant effect on clarity ratings following the 2nd stimulus presentation: including prior condition within the cumulative link mixed-effects model yielded a significant improvement in fit ( $\chi^2(9)=1393$ ,  $p<.001$ ). This model revealed a significant main effect of prior condition ( $\chi^2(2)=54.76$ ,  $p<.001$ ). There was also a main effect of stimulus type ( $\chi^2(1)=11.71$ ,  $p<.001$ ), indicating that clarity ratings tended to be higher following SWS than NVS sentences. However, we did not find evidence for an interaction between prior condition and stimulus type, as the model was not significantly improved by allowing these two predictors to interact ( $\chi^2(13)=12.17$ ,  $p=.514$ ).

Next, we performed post-hoc contrasts to compare differences in clarity ratings between each prior condition. Clarity was significantly higher for P+ than both the P0 (z-ratio=14.75,  $p<.001$ ) and P- (z-ratio=15.99,  $p<.001$ ) conditions, consistent with the experience of perceptual pop-out. Conversely, clarity levels did not significantly differ between P0 and P- (z-ratio=1.05,  $p=.547$ ), confirming that participants needed to be provided with the correct information for pop-out to occur.

Finally, all participants performed at or near ceiling level when asked to determine if the visually displayed sentence (P+ or P- condition) corresponded to the auditory stimulus (mean performance: 95.8% +/- 1.3 and 95.0% +/- 1.4 for SWS and NVS, respectively). This indicates that participants were almost always able to distinguish whether correct information had been supplied, even when the perceived clarity of the degraded sentence remained low.

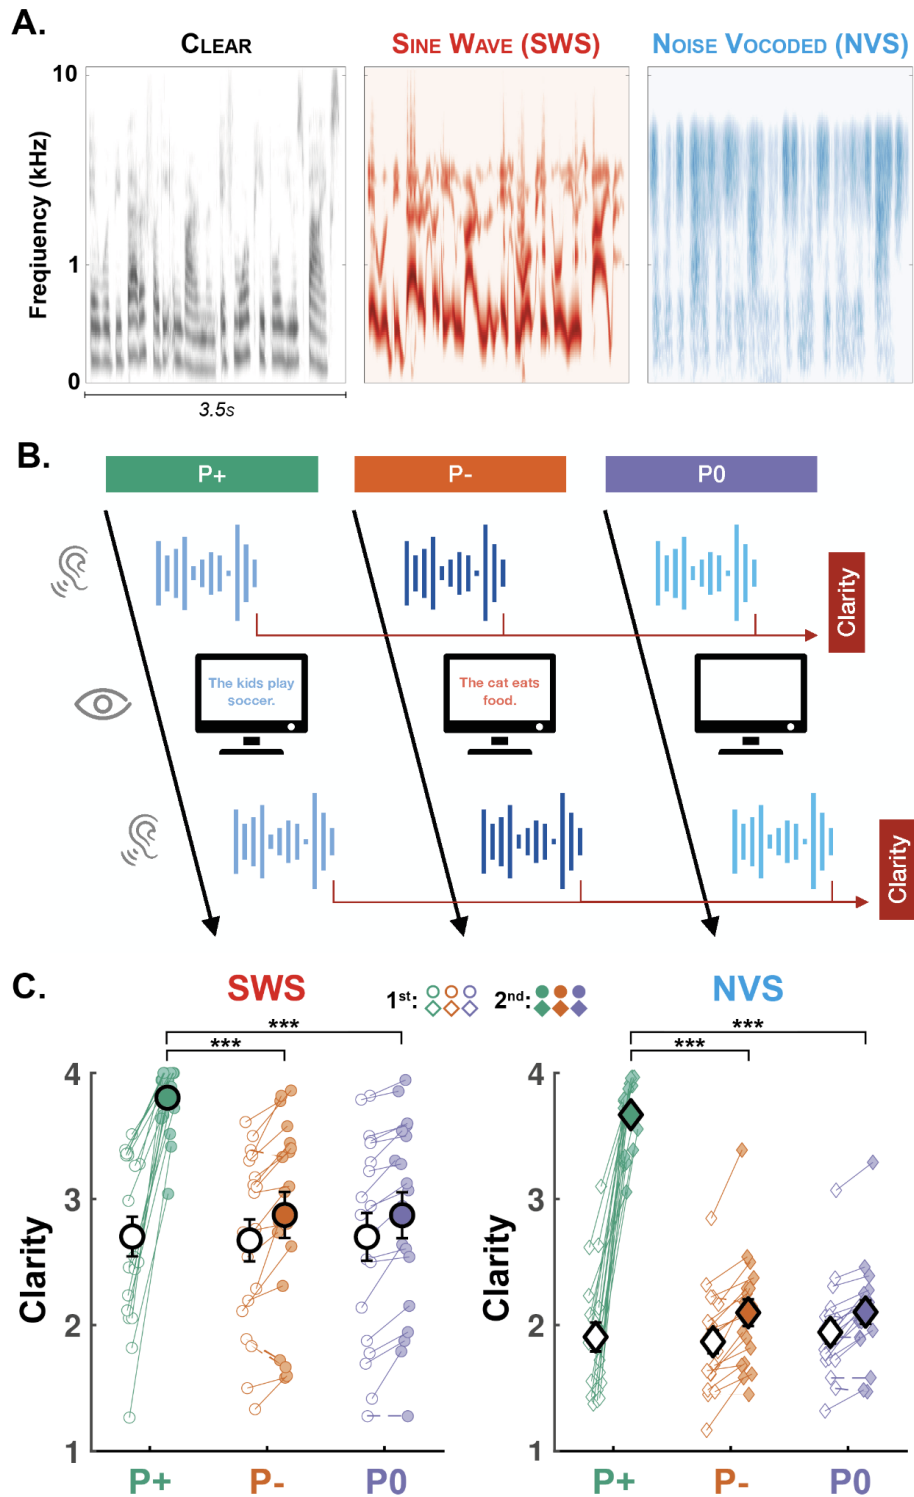

**Figure 1: Experimental design and behavioural results**

*A: Cochlear representations (see Methods for details) of 3.5 s of clear speech (left), Sine Wave Speech (SWS; middle) and Noise Vcoded Speech (NVS; right). B: In each trial, participants listened to two repetitions of the same noisy speech. The two presentations of the stimuli were interleaved with either (i) the corresponding written sentence (correct prior,*

condition P+), (ii) a different sentence (incorrect prior, condition P-), or (iii) no sentence at all (no prior, condition P0). Following each presentation of the stimulus, participants were asked to indicate the subjective clarity of the stimulus they heard. EEG was recorded throughout the task. C: Clarity ratings for the SWS (left, circles) and NVS (right, diamonds) stimuli. Participants were asked to rate the stimuli after the 1st (unfilled circles and diamonds) and 2nd (filled circles and diamonds) presentations. Clarity ratings are averaged for each stimulus type and prior condition (P+: green, P-: orange, and P0: purple). Individual data-points are shown with small circles (SWS) and diamonds (NVS). The two average ratings of each participant and each category are connected with a continuous line if it increases from the 1st to 2nd presentation and a dashed line if it decreases. Large circles and diamonds show the average across the sample (N=19 participants) and error bars show the standard error of the mean (SEM) across participants. Stars indicate the significance levels of post-hoc contrasts across condition levels (marginalised over stimulus type; \*\*\*:  $p < .001$ , \*\*:  $p < .01$ , \*:  $p < .05$ ).

## Correct prior information enhances stimulus reconstruction

Having established the efficacy of our prior condition manipulation, we next explored the neurophysiological substrates of the pop-out effect by examining participant- and group-level average reconstruction coefficients (Figure 2A). The mixed-effects model for reconstruction scores revealed a significant main effect of stimulus type ( $\chi^2(1)=23.49$ ,  $p < .001$ ), indicating that reconstruction scores, just as clarity ratings, were higher following SWS than NVS stimuli. Importantly, a significant main effect was also observed for prior condition ( $\chi^2(2)=15.98$ ,  $p < .001$ ). In fact, model comparisons indicated that models not including the prior condition effect fitted the data significantly worse ( $\chi^2(2)=15.92$ ,  $p < .001$ ), but including interaction terms (two-way interaction between prior condition and stimulus type; three-way

interaction between prior condition, stimulus type, and baseline reconstruction score) did not fit the data significantly better (all  $p > .10$ ).

Again, we interrogated the main effect of prior condition with post-hoc pairwise comparisons. These contrasts revealed that reconstruction scores for the 2nd presentation were higher in the P+ compared to P0 (t-ratio=3.66,  $p < .001$ ) and P- (t-ratio=3.22,  $p = .004$ ) conditions, respectively. Reconstruction scores did not significantly differ between P- and P0 (t-ratio=0.44,  $p = 0.90$ ). In sum, the effect of prior condition on reconstruction scores matched the pattern of effects found on clarity ratings, suggesting a link between the perceptual pop-out and auditory cortical encoding.

We subsequently examined whether the stimulus reconstruction scores could predict the clarity of stimuli on the 2nd presentation above and beyond the prior condition. To do so, we re-fitted the cumulative link mixed-effects model reported above with additional terms encoding the main-effect of reconstruction score, and its interaction with stimulus type and prior condition. This model revealed a significant three-way interaction between stimulus type, condition, and reconstruction scores on clarity ratings ( $\chi^2(2) = 8.58$ ,  $p = .014$ ).

Nonetheless, model comparisons did not reveal a significant improvement in model fit when stimulus reconstruction score was included as either an additive or interactive effect (all  $p > .10$ ). Thus, the ability to predict clarity from reconstruction scores above and beyond prior condition seems limited.

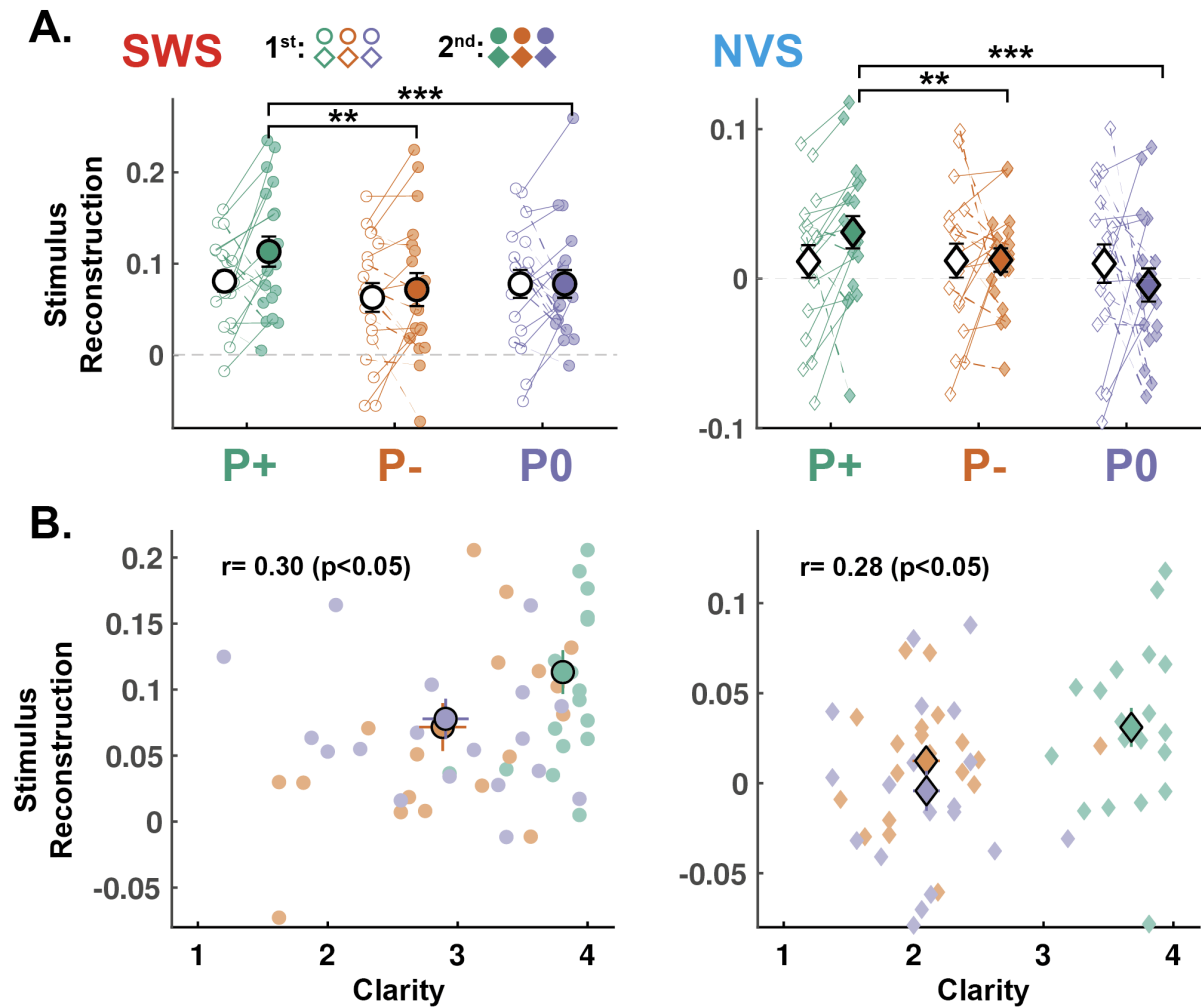

**Figure 2: Correct priors improve stimulus reconstruction**

*A: The envelope of noisy speech was reconstructed from EEG recordings (N=19 participants, see Methods) and a stimulus reconstruction score was computed for the first 3.5 s (1st iteration of the sentence) of each stimulus presentation (1st: unfilled markers; 2nd: filled markers) and for the SWS (left, circles) and NVS (right, diamonds) stimuli separately. Reconstruction scores are averaged for each stimulus type and prior condition (P+: green, P-: orange, and P0: purple). Individual data-points are shown with small circles (SWS) and diamonds (NVS). The two average ratings of each participant and each category are connected with a continuous line if it increases from the 1st to 2nd presentation and a dashed line if it decreases. Large circles and diamonds show the average across the sample (N=19 participants) and error bars show the standard error of the mean (SEM) across participants. Stars indicate the significance levels of post-hoc contrasts across condition*

*levels (\*\*\*:  $p < .001$ , \*\*:  $p < .01$ , \*:  $p < .05$ ). B: Correlation between clarity ratings and reconstruction scores on the 2nd presentation for SWS (left, circles) and NVS (right, diamonds). Individual data-points are shown with small circles (SWS) and diamonds (NVS). Large circles and diamonds show the average across the sample ( $N=19$  participants) and error bars show the standard error of the mean (SEM) across participants. The Pearson's correlation coefficient computed across conditions for the SWS and NVS is shown on each graph along with the associated  $p$ -value.*

### **Prior information exerts frequency-specific effects on sentence processing**

We next examined how the provision of correct or incorrect prior information impacted brain responses to degraded speech. Grand-average time-frequency representations from the 2nd presentation period are displayed for each prior condition in Figure 3A. Cluster-based permutation tests revealed significant differences in the average power across prior conditions for each stimulus type. Relative to the absence of prior information (P0), receiving correct sentence information (P+) resulted in significant positive clusters (indicative of increased mean power) spanning 12 to 17 Hz in the SWS condition ( $p=.006$ ), and 11 to 15 Hz in the NVS condition ( $p=.005$ ). Similarly, receipt of incorrect sentence information (P-) resulted in a significant positive cluster spanning 10 to 15 Hz in the SWS condition ( $p=.002$ ). No significant clusters were identified for the corresponding NVS contrast. Topographies visualising the distribution of these clusters are presented in Figure 3B.

On the basis of these results, a (high) alpha frequency band spanning 10 to 15 Hz was defined for mixed-effects modelling. Additional bands were also specified for the delta (1-3 Hz), theta (4-9 Hz) and beta (16-30 Hz) frequencies. It is worth noting that all these bands have been associated with speech processing in previous studies (see Discussion). All electrode channels were included in the random effects structure for each model. In each set

of nested model comparisons across the four frequency bands, the full model (i.e. including the fixed effect and by-participant random slope interactions between stimulus type and prior condition) demonstrated significantly better fits than the reduced models.

The main effect of stimulus type was significant in the delta ( $\chi^2(1)=4.73, p=.030$ ) and theta ( $\chi^2(1)=8.17, p=.004$ ) models, indicating that NVS stimuli tended to elicit higher mean power than SWS stimuli. This effect was non-significant in the alpha ( $\chi^2(1)=2.88, p=.090$ ) and beta ( $\chi^2(1)=3.82, p=.051$ ) models. The main effect of prior condition was significant for all frequency bands except beta (Delta:  $\chi^2(2)=16.51, p<.001$ ; Theta:  $\chi^2(2)=16.47, p<.001$ ; Alpha:  $\chi^2(2)=32.03, p<.001$ ; Beta:  $\chi^2(2)=0.19, p=.908$ ). The interaction between stimulus type and prior condition was non-significant across all models.

The estimated effects of prior condition on mean spectral power in the delta-, theta-, and alpha-bands are visualised in Figure 3C. Post-hoc comparisons revealed that delta power was significantly increased following P+ compared to P0 (z-ratio=2.36,  $p=.047$ ), and P- compared to P0 (z-ratio=3.89,  $p<.001$ ); the difference between P+ and P- was non-significant (z-ratio=1.46,  $p=.312$ ). Alpha power showed a similar pattern, where power was increased following P+ compared to P0 (z-ratio=3.65,  $p<.001$ ), and P- compared to P0 (z-ratio=5.65,  $p<.001$ ). Again, there was no significant difference in alpha power between P+ and P- (z-ratio=0.98,  $p=.589$ ). By contrast, the theta model revealed a significant decrease in power following P+ compared to P0 (z-ratio=2.58,  $p=.027$ ), and P- (z-ratio=4.26,  $p<.001$ ); the difference between P- and P0 was non-significant (z-ratio=1.99,  $p=.115$ ).



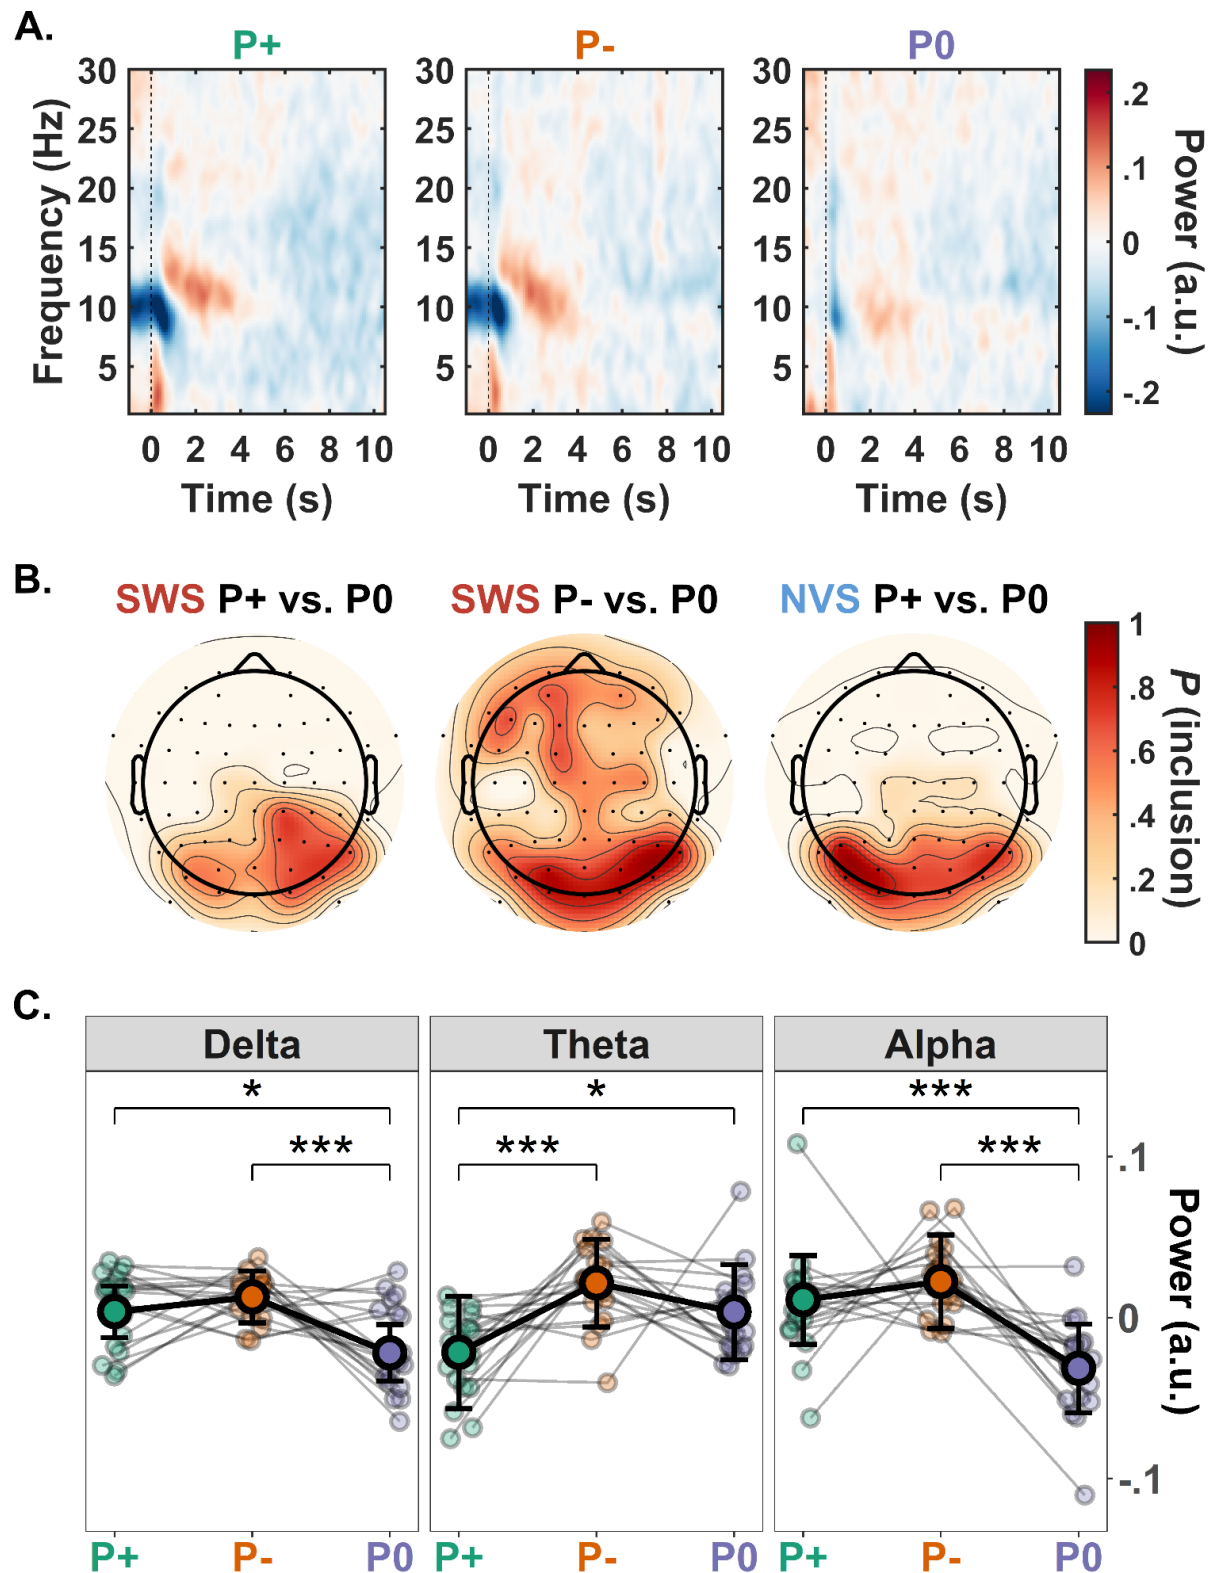

*information across stimulus types. Each presentation comprised 3 iterations of the same noisy stimulus (~3.5 s each). Spectral power estimates from each frequency bin were baseline-corrected using the mean power estimate from the corresponding frequency bin averaged over all time bins spanning the 1st presentation period. B: Topographic distribution of significant clusters identified via cluster-based permutation analysis. Scale indicates probability of electrode inclusion within the 10-15 Hz range used to define the alpha-band (i.e. the proportion of times an electrode was included within the cluster). These plots indicate that significant clusters were predominantly composed of electrodes over posterior scalp regions for P+ vs. P0 contrasts, and more broadly distributed for the SWS P- vs. P0 contrast. C: Visualisation of linear mixed-effects model predictions for delta (1-3 Hz), theta (4-9 Hz), and alpha (10-15 Hz) power during sentence processing for each prior condition (P+: green, P-: orange, and P0: purple). Individual data-points are shown with small circles. Large circles show the estimated marginal means for the prior condition across the sample (N=19 participants); error bars show the standard error of the mean (SEM) across participants. Stars indicate the significance levels of post-hoc contrasts across condition levels (\*\*\*:  $p < .001$ , \*\*:  $p < .01$ , \*:  $p < .05$ ). Note, estimates have been mean-centred for the purposes of visualisation.*

## **Prior information induces increased alpha power and pupil size during sentence processing**

Finally, we focused more specifically on the effect of prior information (P+ or P- vs. P0) on participants' neurophysiological activity, regardless of the correctness of this information. Consistent with our analysis of time-averaged spectral power, the time-course of induced alpha-band activity during the 2nd presentation period was modulated by the provision of prior information. Cluster-based permutation analysis across all electrodes confirmed that P+ and P- both induced significant increases in alpha power compared to P0 (Figure 4A). These

positive clusters were broadly distributed over the scalp, with posterior electrode sites revealing effects that spanned the largest number of time bins (SWS: P+ vs. P0 = [0.8, 3.6]s, P- vs. P0 = [0.8, 3.3]s; NVS: P+ vs. P0 = [1.1, 3.7]s, P- vs. P0 = [0.9, 3.7]s). Note that these effects were preceded by significant negative clusters spanning the pre-stimulus period, indicating that prior information promoted increased alpha desynchronisation prior to sentence onset (SWS: P+ vs. P0 = [-1, 0.4]s, P- vs. P0 = [-1, 0.3]s; NVS: P+ vs. P0 = [-1, 0.6]s, P- vs. P0 = n.s.). Induced activity did not significantly differ between P+ and P- conditions.

We complemented our analysis of alpha power dynamics with a cluster-based permutation on the pupillometry data recorded during sentence processing. Similar to the alpha-band findings above, P+ and P- conditions both evoked increased pupil size compared to P0 (Figure 4B). When examining SWS and NVS stimuli separately, we observed a significant cluster for both P+ vs P0 and P- vs P0 contrasts (SWS: [0.7, 6.4]s, [3.8, 11]s; NVS: [0.6, 11]s, [0.6, 11]s, for P+ vs P0 and P- vs P0 respectively).

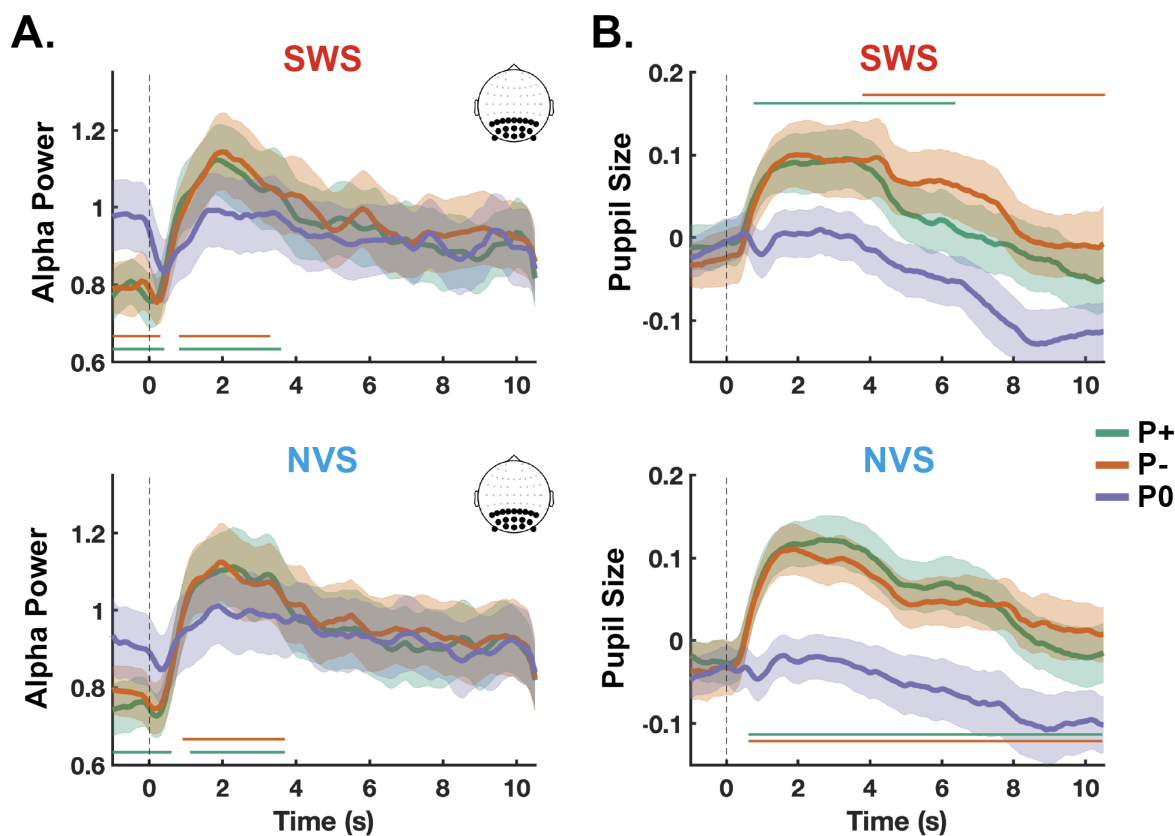

**Figure 4: Expectations modulates alpha power and pupil size**

*Temporal dynamics of induced alpha power (A) and pupil size (B) over the course of the 2nd presentation period for each stimulus type (top: SWS; bottom: NVS) and prior condition (P+: green, P-: orange, and P0: purple). Alpha power is averaged over parieto-occipital electrodes (see black dots on the inset) and expressed as  $\log_{10}$  units. Pupil size is averaged across the two eyes and expressed in arbitrary units. Error shades show the standard error of the mean (SEM) across participants ( $N=19$  participants for alpha power and  $N=17$  for pupil, see Methods). Horizontal bars show the clusters of times showing significant differences (cluster-permutation,  $p < .05$ , see Methods) between the P+ and P0 conditions (green), and P- and P0 conditions (orange).*

## Discussion

This study leveraged the pop-out phenomenon to investigate the predictive mechanisms underpinning sentence-level speech comprehension. To our knowledge, this is the first EEG study of degraded speech processing to use written information to induce sentence pop-out, thereby eliminating potential confounds stemming from previous auditory exposure to the clear version of the sentence. Specifically, our paradigm enabled us to examine the influence of different kinds of prior expectation on both subjective and neurophysiological measures of sentence comprehension, while holding the quantity and quality of acoustic stimulation constant. Our analysis of complementary EEG features (speech envelope reconstruction, spectral power) revealed distinctive patterns of electrophysiological activity that differentiated the generic processing of prior expectations from the specific experience of sentence pop-out. We interpret these results in light of previous studies of degraded speech perception, and the spectral architecture of predictive coding (Arnal and Giraud, 2012; Bastos et al., 2012, 2020; Fontolan et al., 2014; Sedley et al., 2016; Auksztulewicz et al., 2017).

### **Sentence pop-out is accompanied by enhanced stimulus reconstruction**

In line with previous studies using written text to elicit degraded word pop-out (e.g., Sohoglu et al., 2012; Sohoglu and Davis, 2016), sentence intelligibility was markedly improved by the provision of correct prior information only. Incongruent prior information did not significantly affect clarity ratings compared to no information (cf. Sohoglu et al., 2014). Although noise-vocoded speech (NVS) was rated less clear on average than sine-wave speech (SWS; note however the large degree of inter-individual variability apparent in Figure 1C), sentence pop-out was reliably obtained across both stimulus conditions.

This pop-out effect was accompanied by two main electrophysiological correlates: (1) improved stimulus reconstruction (an index of cortical speech envelope tracking), and (2) theta-band (4-9 Hz) power suppression. The stimulus reconstruction finding suggests that information extracted from the written sentence promotes the modulation of low-frequency EEG activity while listening to the corresponding sentence, such that the phase dynamics of the EEG signal better approximate the temporal fluctuations of the speech envelope. This finding is striking for at least two reasons: First, the participant never hears the undistorted version of the sentence at any point in the experiment; hence, the effect is likely mediated by top-down mechanisms rather than low-level adaptations induced by prior sensory experience (cf. Holdgraf et al., 2016). Second, the decoding model used to reconstruct the original speech envelope was trained on brain responses to natural, continuous speech (i.e. the audiobook). As such, the model was never exposed to the particular acoustic features of degraded stimuli, suggesting that improvements in stimulus reconstruction could be detected on the basis of generalisation from clear speech.

The enhancement of stimulus reconstruction quality in the P+ condition supports the notion that reconstruction quality is a reliable indicator of subjective speech clarity. This observation is consistent with previous reports that the quality of speech tracking (or entrainment) covaries with speech intelligibility (Ahissar et al., 2001; Luo and Poeppel, 2007; Gross et al., 2013; Peelle et al., 2013; Ding and Simon, 2014; Doelling et al., 2014). Given that clarity and reconstruction scores were both improved by correct sentence information in the absence of any physical alteration of the auditory stimulus, our findings suggest that a top-down mechanism mediates the pop-out effect by enhancing the precision of cortical speech representations. These results complement those of previous studies manipulating speech tracking and intelligibility through top-down attentional modulation (Rimmele et al., 2015) and bottom-up transcranial stimulation (Riecke et al., 2018).

## **Theta-band suppression indexes sentence comprehension**

Improved sentence comprehension and stimulus reconstruction in the P+ condition were accompanied by a relative reduction in theta-band activity. Mean theta power was also more reduced while listening to SWS, which tended to elicit higher clarity ratings than NVS (suggesting NVS constituted a more acoustically (or cognitively) challenging stimulus than SWS; see Peelle, 2018). These findings are consistent with previous reports linking perceptual filling-in and speech intelligibility with the attenuation of sensory cortical responses (e.g., Sohoglu et al., 2012; Sohoglu and Davis, 2016), including evidence directly implicating theta-band suppression (e.g., Riecke et al., 2009, 2012; Strauß et al., 2014a).

The inverse relation between theta-band power and speech intelligibility might be explained by the involvement of theta dynamics in the retrieval and integration of linguistic representations during online sentence processing (Bastiaansen et al., 2010; Halgren et al., 2015; Lam et al., 2016; Piai et al., 2016; Cross et al., 2018). From a predictive coding perspective, the provision of correct prior information furnishes the listener with an accurate hypothesis (model) of the auditory input they are about to encounter. Such information activates lexical representations in working memory, engendering top-down messages that propagate through descending neuronal pathways to sensory cortices. In this way, correct priors may facilitate the recognition and integration of linguistic structures, characterised by a reduction in theta-band activity (cf. Keitel et al., 2017; Rommers et al., 2017; Donhauser and Baillet, 2020).

## **Delta-, alpha-band power, and pupil dilation as correlates of active listening**

Listening to degraded speech following the provision of written information (P+, P-) resulted in elevated delta-band power compared to the absence of such information (P0; Figure 3C). Delta oscillations have been implicated in the synthesis of higher-level linguistic structure (Keitel et al., 2018; Meyer and Gumbert, 2018; Molinaro and Lizarazu, 2018; Etard and

Reichenbach, 2019; Kaufeld et al., 2020), although much of this literature concerns phase dynamics. Elevated delta-band power might derive from attempts to parse continuous speech according to the segmentation prescribed by the written prior (cf. Ding et al., 2016; Bonhage et al., 2017; Meyer et al., 2017). Alternatively, it might reflect increased phase-synchrony driven by precise expectations about the timing of salient auditory input (Lakatos et al., 2008; Schroeder and Lakatos, 2009; Calderone et al., 2014; Arnal et al., 2015; Kayser et al., 2015; Boucher et al., 2019).

Increased alpha-band power and pupil dilation have received comparatively more widespread attention in the speech comprehension literature, most notably in association with effortful, 'active' listening under adverse conditions (Zekveld et al., 2010; Wöstmann et al., 2015; Dimitrijevic et al., 2017, 2019). Parametric increases in alpha-band power (e.g., Obleser and Weisz, 2012; cf. Hauswald et al., 2020) and pupil size (e.g., Winn et al., 2015; cf. Zekveld et al., 2018) have been reported as the severity of speech degradation intensifies. However, the differences we observed in these variables between the prior and no-prior conditions cannot be ascribed to stimulus properties, since the degree of acoustic degradation was held constant across conditions. Likewise, such differences cannot be explained by sentence (un)intelligibility (cf. Becker et al., 2013) or prior (in)congruence, given the similarity of the responses induced by P+ and P- conditions.

Following previous work implicating alpha oscillations in the top-down inhibition of task-irrelevant cortical networks (Klimesch et al., 2007; Jensen and Mazaheri, 2010) or stimuli (Kerlin et al., 2010; Strauß et al., 2014b; Wöstmann et al., 2016, 2017), alpha synchronisation following written information might represent the re-allocation of attention from visual pathways to the auditory domain; i.e. a covert switch from visual sampling to active listening (cf. Foxe et al., 1998; Fu et al., 2001; Henry et al., 2017). This switch is evidenced in our data by the transition from a reduction in alpha power to an increase around the onset of the second presentation in the P+ and P- conditions (Figure 4A).



Additionally, such activity might index working memory processes involved in mapping online auditory input to linguistic predictions induced by the written text (cf. Obleser et al., 2012; Meyer et al., 2013; Sedley et al., 2016; Wilsch and Obleser, 2016). This explanation is appealing given the close correspondence between the time-course of alpha-band synchronisation and the first sentence iteration. Given the immediacy of the pop-out effect, attempts to match the prior with incoming information are unlikely to persist beyond the first sentence iteration -- either the hypothesis instantiated by the prior is confirmed and the sentence correctly parsed (cf. Friston et al., 2021), or it is disconfirmed and abandoned. This hypothetical process would seem concordant with the temporal evolution of the induced response, which peaks ~2 s following sentence onset, declining thereafter.

While the increase in pupil diameter is similarly marked at the beginning of the sentence presentation following prior information, this response decayed at a much slower rate than that of the alpha synchronisation. This suggests pupil dynamics tap into cognitive processes that are dissociable from those relating to alpha-band dynamics (cf. McMahon et al., 2016; Miles et al., 2017; Alhanbali et al., 2019). Pupil size may reflect more generic aspects of task engagement (Kahneman and Beatty, 1966; Beatty, 1982; Zekveld and Kramer, 2014; Hjortkjær et al., 2020). Increased pupil diameter in both the P+ and P- conditions is consistent with a greater allocation of cognitive resources to the auditory stream when prior information is available, as compared to an absence of prior information in the P0 condition.

## Conclusion

This study provides the first compelling electrophysiological evidence that sentence pop-out is mediated by top-down predictive mechanisms. By manipulating top-down prior information while holding bottom-up sensory information and prior stimulus exposure constant, we demonstrated that correct sentence information and improved clarity are associated with

improved cortical speech tracking (i.e. enhanced stimulus reconstruction). This finding is consistent with a predictive coding interpretation of envelope representation. Our neurophysiological measures revealed distinctive functional profiles: theta activity was relatively reduced following correct information; delta and alpha, as well as pupil size, were increased following any information. These findings indicate that theta-band activity indexes the efficiency of incremental sentence processing and is sensitive to intelligibility, whereas delta- and alpha-bands, along with pupil size, track attentional regulation and model evaluation during active listening.

## References

- Ahissar E, Nagarajan S, Ahissar M, Protopapas A, Mahncke H, Merzenich MM (2001) Speech comprehension is correlated with temporal response patterns recorded from auditory cortex. *Proc Natl Acad Sci* 98:13367–13372.
- Alday PM (2019) How much baseline correction do we need in ERP research? Extended GLM model can replace baseline correction while lifting its limits. *Psychophysiology* 56:e13451.
- Alhanbali S, Dawes P, Millman RE, Munro KJ (2019) Measures of listening effort are multidimensional. *Ear Hear* 40:1084–1097.
- Arnal LH, Doelling KB, Poeppel D (2015) Delta–beta coupled oscillations underlie temporal prediction accuracy. *Cereb Cortex* 25:3077–3085.
- Arnal LH, Giraud A-L (2012) Cortical oscillations and sensory predictions. *Trends Cogn Sci* 16:390–398.
- Auksztulewicz R, Friston KJ, Nobre AC (2017) Task relevance modulates the behavioural and neural effects of sensory predictions Jensen O, ed. *PLOS Biol* 15:e2003143.
- Baltzell LS, Srinivasan R, Richards VM (2017) The effect of prior knowledge and intelligibility on the cortical entrainment response to speech. *J Neurophysiol* 118:3144–3151.
- Banellis L, Sokoliuk R, Wild CJ, Bowman H, Cruse D (2020) Event-related potentials reflect prediction errors and pop-out during comprehension of degraded speech. *Neurosci Conscious* 2020:niaa022.
- Barr DJ, Levy R, Scheepers C, Tily HJ (2013) Random effects structure for confirmatory hypothesis testing: Keep it maximal. *J Mem Lang* 68.
- Bastiaansen M, Magyari L, Hagoort P (2010) Syntactic unification operations are reflected in oscillatory dynamics during on-line sentence comprehension. *J Cogn Neurosci* 22:1333–1347.
- Bastos AM, Lundqvist M, Waite AS, Kopell N, Miller EK (2020) Layer and rhythm specificity for predictive routing. *Proc Natl Acad Sci* 117:31459–31469.
- Bastos AM, Usrey WM, Adams RA, Mangun GR, Fries P, Friston KJ (2012) Canonical microcircuits for predictive coding. *Neuron* 76:695–711.
- Bates D, Mächler M, Bolker B, Walker S (2015) Fitting linear mixed-effects models using lme4. *J Stat Softw* 67:1–48.
- Beatty J (1982) Task-evoked pupillary responses, processing load, and the structure of processing resources. *Psychol Bull* 91:276–292.
- Becker R, Pefkou M, Michel CM, Hervais-Adelman AG (2013) Left temporal alpha-band activity reflects single word intelligibility. *Front Syst Neurosci* 7 Available at: <http://journal.frontiersin.org/article/10.3389/fnsys.2013.00121/abstract> [Accessed August 15, 2021].
- Bell AJ, Sejnowski TJ (1995) An information-maximization approach to blind separation and blind deconvolution. *Neural Comput* 7:1129–1159.
- Blank H, Davis MH (2016) Prediction errors but not sharpened signals simulate multivoxel fMRI patterns during speech perception. *PLoS Biol* 14:e1002577.
- Boersma P, Weenink D (2011) Praat: Doing phonetics by computer.
- Bonhage CE, Meyer L, Gruber T, Friederici AD, Mueller JL (2017) Oscillatory EEG dynamics underlying automatic chunking during sentence processing. *NeuroImage* 152:647–657.
- Bornkessel-Schlesewsky I, Schlesewsky M (2019) Toward a neurobiologically plausible model of language-related, negative event-related potentials. *Front Psychol* 10:298.
- Boucher VJ, Gilbert AC, Jemel B (2019) The role of low-frequency neural oscillations in speech processing: Revisiting delta entrainment. *J Cogn Neurosci* 31:1205–1215.
- Brainard DH (1997) The psychophysics toolbox. *Spat Vis* 10:433–436.
- Brodbeck C, Simon JZ (2020) Continuous speech processing. *Curr Opin Physiol* 18:25–31.
- Calderone DJ, Lakatos P, Butler PD, Castellanos FX (2014) Entrainment of neural

- oscillations as a modifiable substrate of attention. *Trends Cogn Sci* 18:300–309.
- Christensen RHB (2019) ordinal – Regression models for ordinal data.
- Christiansen MH, Chater N (2016) The Now-or-Never bottleneck: A fundamental constraint on language. *Behav Brain Sci* 39.
- Cross ZR, Kohler MJ, Schlesewsky M, Gaskell MG, Bornkessel-Schlesewsky I (2018) Sleep-dependent memory consolidation and incremental sentence comprehension: Computational dependencies during language learning as revealed by neuronal oscillations. *Front Hum Neurosci* 12:18.
- Crosse MJ, Di Liberto GM, Bednar A, Lalor EC (2016) The multivariate temporal response function (mTRF) toolbox: A MATLAB toolbox for relating neural signals to continuous stimuli. *Front Hum Neurosci* 10:604.
- Davis MH, Johnsrude IS, Hervais-Adelman A, Taylor K, McGettigan C (2005) Lexical information drives perceptual learning of distorted speech: Evidence from the comprehension of noise-vocoded sentences. *J Exp Psychol Gen* 134:222–241.
- Dehaene-Lambertz G, Pallier C, Serniclaes W, Sprenger-Charolles L, Jobert A, Dehaene S (2005) Neural correlates of switching from auditory to speech perception. *NeuroImage* 24:21–33.
- Delorme A, Makeig S (2004) EEGLAB: An open source toolbox for analysis of single-trial EEG dynamics including independent component analysis. *J Neurosci Methods* 134:9–21.
- Di Liberto GM, Crosse MJ, Lalor EC (2018) Cortical Measures of Phoneme-Level Speech Encoding Correlate with the Perceived Clarity of Natural Speech. *eneuro* 5:ENEURO.0084-18.2018.
- Dimitrijevic A, Smith ML, Kadis DS, Moore DR (2017) Cortical alpha oscillations predict speech intelligibility. *Front Hum Neurosci* 11 Available at: <http://journal.frontiersin.org/article/10.3389/fnhum.2017.00088/full> [Accessed August 15, 2021].
- Dimitrijevic A, Smith ML, Kadis DS, Moore DR (2019) Neural indices of listening effort in noisy environments. *Sci Rep* 9:11278.
- Ding N, Melloni L, Zhang H, Tian X, Poeppel D (2016) Cortical tracking of hierarchical linguistic structures in connected speech. *Nat Neurosci* 19:158–164.
- Ding N, Simon JZ (2014) Cortical entrainment to continuous speech: Functional roles and interpretations. *Front Hum Neurosci* 8:311.
- Doelling KB, Arnal LH, Ghitza O, Poeppel D (2014) Acoustic landmarks drive delta-theta oscillations to enable speech comprehension by facilitating perceptual parsing. *NeuroImage* 85 Pt 2:761–768.
- Donhauser PW, Baillet S (2020) Two distinct neural timescales for predictive speech processing. *Neuron* 105:385–393.e9.
- Etard O, Reichenbach T (2019) Neural speech tracking in the theta and in the delta frequency band differentially encode clarity and comprehension of speech in noise. *J Neurosci* 39:5750–5759.
- Fontolan L, Morillon B, Liegeois-Chauvel C, Giraud A-L (2014) The contribution of frequency-specific activity to hierarchical information processing in the human auditory cortex. *Nat Commun* 5:4694.
- Fox J, Weisberg S (2019) *An R companion to applied regression*, 3rd ed. Thousand Oaks CA: Sage.
- Foxe JJ, Simpson GV, Ahlfors SP (1998) Parieto-occipital ~10Hz activity reflects anticipatory state of visual attention mechanisms: *NeuroReport* 9:3929–3933.
- Friston KJ, Kiebel S (2009) Predictive coding under the free-energy principle. *Philos Trans R Soc B* 364:1211–1221.
- Friston KJ, Sajid N, Quiroga-Martinez DR, Parr T, Price CJ, Holmes E (2021) Active listening. *Hear Res* 399:107998.
- Fu K-MG, Foxe JJ, Murray MM, Higgins BA, Javitt DC, Schroeder CE (2001) Attention-dependent suppression of distracter visual input can be cross-modally cued as indexed by anticipatory parieto-occipital alpha-band oscillations. *Cogn Brain Res*

12:145–152.

- Giraud AL, Kell C, Thierfelder C, Sterzer P, Russ MO, Preibisch C, Kleinschmidt A (2004) Contributions of sensory input, auditory search and verbal comprehension to cortical activity during speech processing. *Cereb Cortex* 14:247–255.
- Giraud A-L, Poeppel D (2012) Cortical oscillations and speech processing: Emerging computational principles and operations. *Nat Neurosci* 15:511–517.
- Gross J, Hoogenboom N, Thut G, Schyns P, Panzeri S, Belin P, Garrod S (2013) Speech rhythms and multiplexed oscillatory sensory coding in the human brain. *PLoS Biol* 11:e1001752.
- Guediche S, Blumstein SE, Fiez JA, Holt LL (2014) Speech perception under adverse conditions: Insights from behavioral, computational, and neuroscience research. *Front Syst Neurosci* 7:126.
- Halgren E, Kaestner E, Marinkovic K, Cash SS, Wang C, Schomer DL, Madsen JR, Ulbert I (2015) Laminar profile of spontaneous and evoked theta: Rhythmic modulation of cortical processing during word integration. *Neuropsychologia* 76:108–124.
- Halle M, Stevens K (1962) Speech recognition: A model and a program for research. *IEEE Trans Inf Theory* 8:155–159.
- Halle M, Stevens KN (1959) Analysis by synthesis. In: Proceedings of the seminar on speech comprehension and processing (Wathen-Dunn W, Woods, L. E., eds). Bedford, MA: USAF Cambridge Research Center.
- Hauswald A, Keitel A, Chen Y-P, Rösch S, Weisz N (2020) Degradation levels of continuous speech affect neural speech tracking and alpha power differently. *Eur J Neurosci*.
- Heilbron M, Chait M (2018) Great expectations: Is there evidence for predictive coding in auditory cortex? *Neuroscience* 389:54–73.
- Henry MJ, Herrmann B, Kunke D, Obleser J (2017) Aging affects the balance of neural entrainment and top-down neural modulation in the listening brain. *Nat Commun* 8:15801.
- Hervé M (2021) RVAideMemoire: Testing and plotting procedures for biostatistics.
- Hickok G, Poeppel D (2007) The cortical organization of speech processing. *Nat Rev Neurosci* 8:393–402.
- Hjortkjær J, Märcher-Rørsted J, Fuglsang SA, Dau T (2020) Cortical oscillations and entrainment in speech processing during working memory load. *Eur J Neurosci* 51:1279–1289.
- Holdgraf CR, de Heer W, Pasley B, Rieger J, Crone N, Lin JJ, Knight RT, Theunissen FE (2016) Rapid tuning shifts in human auditory cortex enhance speech intelligibility. *Nat Commun* 7:13654.
- Jensen O, Mazaheri A (2010) Shaping functional architecture by oscillatory alpha activity: Gating by inhibition. *Front Hum Neurosci* 4:1–8.
- Kahneman D, Beatty J (1966) Pupil Diameter and Load on Memory. *Science* 154:1583–1585.
- Kalcher J, Pfurtscheller G (1995) Discrimination between phase-locked and non-phase-locked event-related EEG activity. *Electroencephalogr Clin Neurophysiol* 94:381–384.
- Kaufeld G, Bosker HR, ten Oever S, Alday PM, Meyer AS, Martin AE (2020) Linguistic structure and meaning organize neural oscillations into a content-specific hierarchy. *J Neurosci* 40:9467–9475.
- Kayser SJ, Ince RAA, Gross J, Kayser C (2015) Irregular speech rate dissociates auditory cortical entrainment, evoked responses, and frontal alpha. *J Neurosci* 35:14691–14701.
- Keitel A, Gross J, Kayser C (2018) Perceptually relevant speech tracking in auditory and motor cortex reflects distinct linguistic features Bizley J, ed. *PLOS Biol* 16:e2004473.
- Keitel A, Ince RAA, Gross J, Kayser C (2017) Auditory cortical delta-entrainment interacts with oscillatory power in multiple fronto-parietal networks. *NeuroImage* 147:32–42.
- Kerlin JR, Shahin AJ, Miller LM (2010) Attentional gain control of ongoing cortical speech representations in a “cocktail party.” *J Neurosci* 30:620–628.

- Klimesch W, Sauseng P, Hanslmayr S (2007) EEG alpha oscillations: The inhibition-timing hypothesis. *Brain Res Rev* 53:63–88.
- Kuperberg GR, Jaeger TF (2016) What do we mean by prediction in language comprehension? *Lang Cogn Neurosci* 31:32–59.
- Lakatos P, Karmos G, Mehta AD, Ulbert I, Schroeder CE (2008) Entrainment of neuronal oscillations as a mechanism of attentional selection. *Science* 320:110–113.
- Lam NHL, Schoffelen J-M, Uddén J, Hultén A, Hagoort P (2016) Neural activity during sentence processing as reflected in theta, alpha, beta, and gamma oscillations. *NeuroImage* 142:43–54.
- Leaver AM, Rauschecker JP (2010) Cortical representation of natural complex sounds: Effects of acoustic features and auditory object category. *J Neurosci* 30:7604–7612.
- Legendre G, Andrillon T, Koroma M, Kouider S (2019) Sleepers track informative speech in a multitalker environment. *Nat Hum Behav* 3:274–283.
- Lenth R (2020) emmeans: Estimated marginal means, aka least-squares means.
- Leonard MK, Baud MO, Sjerps MJ, Chang EF (2016) Perceptual restoration of masked speech in human cortex. *Nat Commun* 7:13619.
- Liebherr M, Corcoran AW, Alday PM, Coussens S, Bellan V, Howlett CA, Immink MA, Kohler M, Schlesewsky M, Bornkessel-Schlesewsky I (2021) EEG and behavioral correlates of attentional processing while walking and navigating naturalistic environments. *Neuroscience*. Available at: <http://biorxiv.org/lookup/doi/10.1101/2021.05.27.445993> [Accessed August 1, 2021].
- Lüdecke D, Ben-Shachar M, Patil I, Waggoner P, Makowski D (2021) performance: An R package for assessment, comparison and testing of statistical models. *J Open Source Softw* 6:3139.
- Luo H, Poeppel D (2007) Phase patterns of neuronal responses reliably discriminate speech in human auditory cortex. *Neuron* 54:1001–1010.
- Maris E (2012) Statistical testing in electrophysiological studies. *Psychophysiology* 49:549–565.
- Maris E, Oostenveld R (2007) Nonparametric statistical testing of EEG- and MEG-data. *J Neurosci Methods* 164:177–190.
- Mattys SL, Davis MH, Bradlow AR, Scott SK (2012) Speech recognition in adverse conditions: A review. *Lang Cogn Process* 27:953–978.
- McMahon CM, Boisvert I, de Lissa P, Granger L, Ibrahim R, Lo CY, Miles K, Graham PL (2016) Monitoring alpha oscillations and pupil dilation across a performance-Intensity Function. *Front Psychol* 7:745.
- Meyer L, Gumbert M (2018) Synchronization of electrophysiological responses with speech benefits syntactic information processing. *J Cogn Neurosci* 30:1066–1074.
- Meyer L, Henry MJ, Gaston P, Schmuck N, Friederici AD (2017) Linguistic bias modulates interpretation of speech via neural delta-band oscillations. *Cereb Cortex* 27:4293–4302.
- Meyer L, Obleser J, Friederici AD (2013) Left parietal alpha enhancement during working memory-intensive sentence processing. *Cortex* 49:711–721.
- Miles K, McMahon C, Boisvert I, Ibrahim R, de Lissa P, Graham P, Lyxell B (2017) Objective assessment of listening effort: Coregistration of pupillometry and EEG. *Trends Hear* 21:1–13.
- Miller GA, Isard S (1963) Some perceptual consequences of linguistic rules. *J Verbal Learn Verbal Behav* 2:217–228.
- Molinaro N, Lizarazu M (2018) Delta (but not theta)-band cortical entrainment involves speech-specific processing. *Eur J Neurosci* 48:2642–2650.
- Obleser J, Weisz N (2012) Suppressed alpha oscillations predict intelligibility of speech and its acoustic details. *Cereb Cortex* 22:2466–2477.
- Obleser J, Wöstmann M, Hellbernd N, Wilsch A, Maess B (2012) Adverse listening conditions and memory load drive a common alpha oscillatory network. *J Neurosci* 32:12376–12383.
- O’Sullivan JA, Power AJ, Mesgarani N, Rajaram S, Foxe JJ, Shinn-Cunningham BG, Slaney

- M, Shamma SA, Lalor EC (2015) Attentional selection in a cocktail party environment can be decoded from single-trial EEG. *Cereb Cortex* 25:1697–1706.
- Peelle JE (2018) Listening Effort: How the Cognitive Consequences of Acoustic Challenge Are Reflected in Brain and Behavior. *Ear Hear* 39:204–214.
- Peelle JE, Davis MH (2012) Neural oscillations carry speech rhythm through to comprehension. *Front Psychol* 3:320.
- Peelle JE, Gross J, Davis MH (2013) Phase-locked responses to speech in human auditory cortex are enhanced during comprehension. *Cereb Cortex* 23:1378–1387.
- Pfurtscheller G, Lopes da Silva FH (1999) Event-related EEG/MEG synchronization and desynchronization: Basic principles. *Clin Neurophysiol* 110:1842–1857.
- Piai V, Anderson KL, Lin JJ, Dewar C, Parvizi J, Dronkers NF, Knight RT (2016) Direct brain recordings reveal hippocampal rhythm underpinnings of language processing. *Proc Natl Acad Sci* 113:11366–11371.
- Poeppel D, Idsardi WJ, van Wassenhove V (2008) Speech perception at the interface of neurobiology and linguistics. *Philos Trans R Soc B Biol Sci* 363:1071–1086.
- R Core Team (2019) R: A language and environment for statistical computing. Vienna: R Foundation for Statistical Computing.
- Remez RE, Rubin PE, Pisoni DB, Carrell TD (1981) Speech perception without traditional speech cues. *Science* 212:947–949.
- Riecke L, Esposito F, Bonte M, Formisano E (2009) Hearing illusory sounds in noise: the timing of sensory-perceptual transformations in auditory cortex. *Neuron* 64:550–561.
- Riecke L, Formisano E, Sorger B, Başkent D, Gaudrain E (2018) Neural Entrainment to Speech Modulates Speech Intelligibility. *Curr Biol* 28:161-169.e5.
- Riecke L, Vanbussel M, Hausfeld L, Başkent D, Formisano E, Esposito F (2012) Hearing an illusory vowel in noise: suppression of auditory cortical activity. *J Neurosci* 32:8024–8034.
- Rimmele JM, Zion Golombic E, Schröger E, Poeppel D (2015) The effects of selective attention and speech acoustics on neural speech-tracking in a multi-talker scene. *Cortex* 68:144–154.
- Rommers J, Dickson DS, Norton JJS, Wlotko EW, Federmeier KD (2017) Alpha and theta band dynamics related to sentential constraint and word expectancy. *Lang Cogn Neurosci* 32:576–589.
- Sassenhagen J, Draschkow D (2019) Cluster-based permutation tests of MEG/EEG data do not establish significance of effect latency or location. *Psychophysiology* 56:e13335.
- Schroeder CE, Lakatos P (2009) Low-frequency neuronal oscillations as instruments of sensory selection. *Trends Neurosci* 32:9–18.
- Sedley W, Gander PE, Kumar S, Kovach CK, Oya H, Kawasaki H, Howard III MA, Griffiths TD (2016) Neural signatures of perceptual inference. *eLife* 5:1–13.
- Shahin AJ, Kerlin JR, Bhat J, Miller LM (2012) Neural restoration of degraded audiovisual speech. *NeuroImage* 60:530–538.
- Shannon RV, Zeng FG, Kamath V, Wygonski J, Ekelid M (1995) Speech recognition with primarily temporal cues. *Science* 270:303–304.
- Sohoglu E, Davis MH (2016) Perceptual learning of degraded speech by minimizing prediction error. *Proc Natl Acad Sci* 113:E1747–E1756.
- Sohoglu E, Davis MH (2020) Rapid computations of spectrotemporal prediction error support perception of degraded speech. *eLife* 9.
- Sohoglu E, Peelle JE, Carlyon RP, Davis MH (2012) Predictive top-down integration of prior knowledge during speech perception. *J Neurosci* 32:8443–8453.
- Sohoglu E, Peelle JE, Carlyon RP, Davis MH (2014) Top-down influences of written text on perceived clarity of degraded speech. *J Exp Psychol Hum Percept Perform* 40:186–199.
- Strauß A, Kotz SA, Scharinger M, Obleser J (2014a) Alpha and theta brain oscillations index dissociable processes in spoken word recognition. *NeuroImage* 97:387–395.
- Strauß A, Wöstmann M, Obleser J (2014b) Cortical alpha oscillations as a tool for auditory selective inhibition. *Front Hum Neurosci* 8 Available at:

- <http://journal.frontiersin.org/article/10.3389/fnhum.2014.00350/abstract> [Accessed August 14, 2021].
- Tuennenhoff J, Noppeney U (2016) When sentences live up to your expectations. *NeuroImage* 124:641–653.
- Tulving E, Gold C (1963) Stimulus information and contextual information as determinants of tachistoscopic recognition of words. *J Exp Psychol* 66:319–327.
- Wickham H et al. (2019) Welcome to the Tidyverse. *J Open Source Softw* 4:1686.
- Wild CJ, Davis MH, Johnsrude IS (2012) Human auditory cortex is sensitive to the perceived clarity of speech. *NeuroImage* 60:1490–1502.
- Wilsch A, Obleser J (2016) What works in auditory working memory? A neural oscillations perspective. *Brain Res* 1640:193–207.
- Winn MB, Edwards JR, Litovsky RY (2015) The Impact of Auditory Spectral Resolution on Listening Effort Revealed by Pupil Dilation. *Ear Hear* 36:e153–e165.
- Wöstmann M, Herrmann B, Maess B, Obleser J (2016) Spatiotemporal dynamics of auditory attention synchronize with speech. *Proc Natl Acad Sci* 113:3873–3878.
- Wöstmann M, Herrmann B, Wilsch A, Obleser J (2015) Neural alpha dynamics in younger and older listeners reflect acoustic challenges and predictive benefits. *J Neurosci* 35:1458–1467.
- Wöstmann M, Lim S-J, Obleser J (2017) The human neural alpha response to speech is a proxy of attentional control. *Cereb Cortex* 27:3307–3317.
- Zekveld AA, Koelewijn T, Kramer SE (2018) The pupil dilation response to auditory stimuli: Current state of knowledge. *Trends Hear* 22:233121651877717.
- Zekveld AA, Kramer SE (2014) Cognitive processing load across a wide range of listening conditions: Insights from pupillometry. *Psychophysiology* 51:277–284.
- Zekveld AA, Kramer SE, Festen JM (2010) Pupil response as an indication of effortful listening: The influence of sentence intelligibility. *Ear Hear* 31:480–490.
